# Supplementary material for: The oncogenic kinase NEK2 regulates an RBFOX2-dependent pro-mesenchymal splicing program in triple-negative breast cancer cells
Source: PubMed Central journal article supplement (PMC8686545; doi:10.1186/s13046-021-02210-3), 2021-12-20
Supplement: 13046_2021_2210_MOESM1_ESM.pdf [file 13046_2021_2210_MOESM1_ESM.pdf]

**Supplemental Table 1. Sequences of si-RNAs used in this study**

| <b>si-RNA name</b> | <b>siRNA sequence (5'-3')</b> |
|--------------------|-------------------------------|
| siCTRL_1           | UGGUUUACAUGUCGACUAA           |
| siCTRL_2           | UGGUUUACAUGUUGUGUGA           |
| siCTRL_3           | UGGUUUACAUGUUUUCUGA           |
| siCTRL_4           | UGGUUUACAUGUUUUCUA            |
| si-NEK2_1          | GGAUCUGGCUAGUGUAAU            |
| si-NEK2_2          | GCAGACAGAUCCUGGGCAU           |
| si-NEK2_3          | GGCAAUACUUAGAUGAAGA           |
| si-NEK2_4          | GCUAGAAUUAACCAUG              |
| si-RBFOX2_1        | CUCACUAUGUUCUUUGAAU           |
| si-RBFOX2_2        | GGGUUCGUAACUUUCGAGA           |
| si-RBFOX2_3        | AUAUGCAAUUGGUUGGAAA           |
| si-hnRNPL          | GCUUGAAUGUGUUCAAGAA           |
| siMYO18A exon 48   | AUUCUUUCUUUCUGAUACUU          |
| siSPAG9 exon 30    | UAAACGUCCUGGUGGAGGAU          |
| siSORBS1 exon 12   | AUCUAGAGUCGGGAAGGUCAG         |

**Supplemental Table 2. List of sequences of primers used in this study**

| <b>Primer name</b> | <b>Sequence (5'-3')</b>   |
|--------------------|---------------------------|
| ADD3 FW            | ACCAGCTCCTCCTAACCCAT      |
| ADD3 REV           | CTACCATGACAGGCACTTCCA     |
| ATP5C1 EX 10 REV   | GGACAAAGGCAGCAGTAAGC      |
| ATP5C1 EX 8 FW     | CATTCAACCGTACCCGCCAA      |
| CDH11 FW           | TGGCAGCAAGTATCCAATGG      |
| CDH11 RV           | TTGGTTACGTGGTAGGCAC       |
| CLSTN1 FW          | TGTGACTGAGGATTACCCGCT     |
| CLSTN1 REV         | GAACGGAGAGTTAAGCCAGCC     |
| EXOC1 EX 10 FW     | TGCAAAGATCAAGATGACTGGCA   |
| EXOC1 EX 12 REV    | ACTGAGATCTGCGATTCCCTGA    |
| FAT1 FW            | GCCTGTCTGAAGTGCAGTCTC     |
| FAT1 REV           | GGGAACTCTTGTATGTCCGGC     |
| FKBP9 FW           | GCTTGCCTACGGAAATGAAG      |
| FKBP9 REV          | GGGGCTTAAAATAGGTGTGA      |
| GAPDH FW           | CCCTTCATTGACCTCAACTACATG  |
| GAPDH REV          | TGGGATTTCCATTGATGACAAGC   |
| ITGA6 EX 26 FW     | TCGGGAGTACCTTGGTGGATC     |
| ITGA6 EX 28 RV     | TTAGGCCCCCGCTATGAGTAG     |
| KIF13A EX 38 FW    | GCAAGGCCTCTTCTAAGCCAG     |
| KIF13A EX 40 REV   | GCACTGTGGGAAAAGTAGCCA     |
| L34 FW             | GTCCCGAACCCCTGGTAATAGA    |
| L34 REV            | GGCCCTGCTGACATGTTTCTT     |
| LRRFIP2 EX 22 FW   | CATCCAGACGAGGAAGTGGG      |
| LRRFIP2 EX 24 RV   | CTGCCATCTGTTCTCCTCGC      |
| MARK3 FW           | CATTGTCCCAGACTCGAAGCC     |
| MARK3 REV          | GGGATCGAGGCTTTGCTTCTT     |
| MYO18A EX 47 FW    | AGTTGGCATTCAAGCGCATC      |
| MYO18A EX 49 REV   | GACAACCAGGACTTGACCCC      |
| NEK2 FW            | AGGAAATTCAGTTACAGGAGCG    |
| NEK2 RV            | TCCTCTGCTAGTCTCTCACGA     |
| NFY-A FW           | GGAGCAGTATACAGC           |
| NFY-A REV          | GCTGCAAACCCTGTGTTCC       |
| NUMB EX 12 FW      | AGGACCCCTTCTCATCTGCT      |
| NUMB EX 13 REV     | GCACCAGAAGATTGACCCCA      |
| PLOD2 FW           | GCTCTTTGCCGAAATGCTAGA     |
| PLOD2 REV          | TTCAAAAATCTGCCAGAGGTCA    |
| RAI14 EX 14 FW     | AAGACCCCAACAAAACCAAAGC    |
| RAI14 EX 16 REV    | CTTGAAGGGTGGTTCAGCAA      |
| RBFOX2 FW ex8      | GCTACAGCACGTGTAATGACC     |
| RBFOX2 REV ex10    | TTGCCTAGGGACACATCTGC      |
| SORBS1 ex 10 FW    | GTGGAGGCTTTCTTCCAGTGC     |
| SORBS1 ex 13 REV   | CTCGATTGTGTTGCAAGAGC      |
| SPAG9 EX 29 FW     | TGTAATCGTTTGTGGGTGGGG     |
| SPAG9 EX 31 REV    | CACGGATTACACTTCCAGGACG    |
| SPTAN1 EX 23 FW    | GTGAAGAAATTGGACCCCGC      |
| SPTAN1 EX 25 REV   | CCTCCTCACTTGTGAGAGCG      |
| SUCO FW            | TGGTAGAGATGAGCGGAATGT     |
| SUCO REV           | TGGACAAAAGTGCTCTGATCCA    |
| VIM FW             | AGACACTATTGGCCGCTGCAGGATG |
| VIM RV             | CCCTCAGGTTTCAGGGAGGAAAA   |
| ZEB1 FW            | ACTCAACTACGGTCAGCCCT      |
| ZEB1 RV            | TGGGCGGTGTAGAATCAGAG      |
| ZEB2 FW            | CAAGAGGCGCAAACAAGCC       |
| ZEB2 RV            | GGTTGGCAATACCGTCATCC      |
